# Supplementary material for: Facile preparation of N-doped graphene quantum dots as quick-dry fluorescent ink for anti-counterfeiting
Source: Royal Society of Chemistry journal article supplement (doi:10.1039/c8nj03375g), 2018-01-01
Supplement: c8nj03375g1.pdf [file c8nj03375g1.pdf]

## Supplementary Material

### Facile preparation of N-doped graphene quantum dots as quickly-dried fluorescent ink for anti-counterfeiting

Youyou Pang, Rujian Zhao, Yao Lu, Jiyang Liu\*, Xiaoping Dong\*, Fengna Xi

Department of Chemistry, Zhejiang Sci-Tech University, 5 Second Avenue, Xiasha

Higher Education Zone, Hangzhou, 310018, PR China

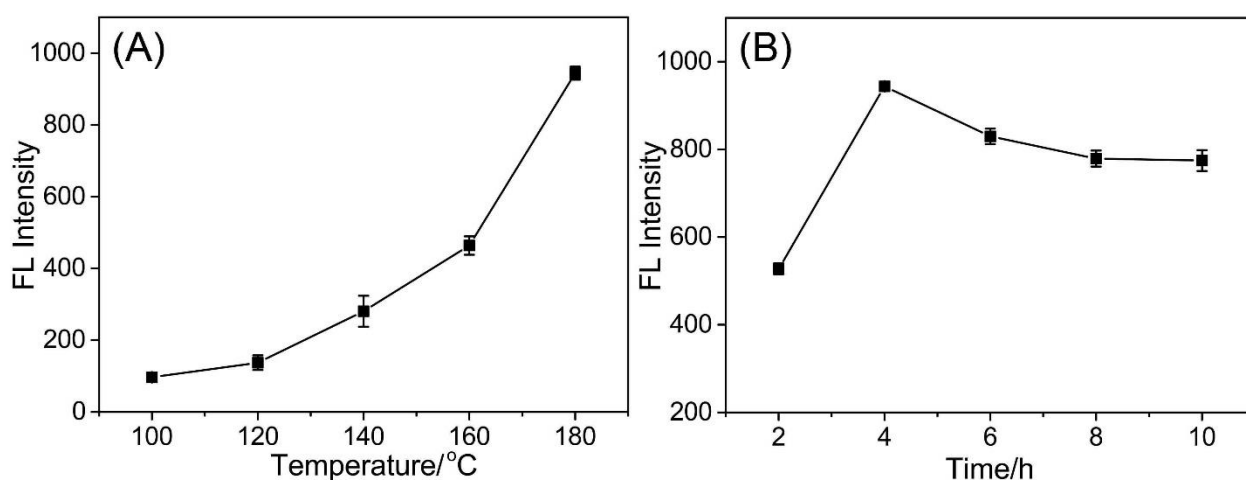

**Fig. S1.** Fluorescence intensity of N-GQDs prepared at different temperature (A) and time (B) in solvothermal synthesis.

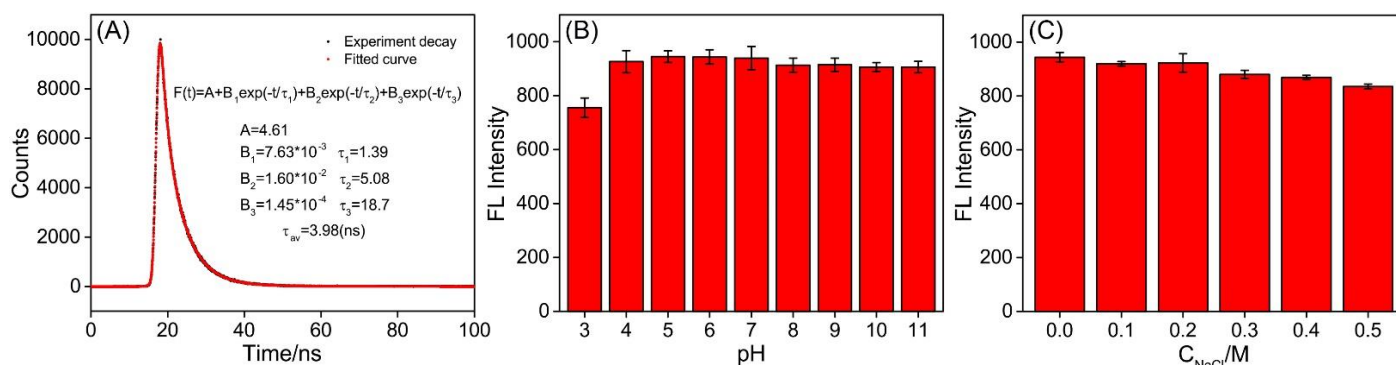

**Fig. S2.** (A): Fluorescence lifetime of N-GQDs. (B-C): The FL intensity of N-GQDs at different pH (B) and different concentration of NaCl (C).

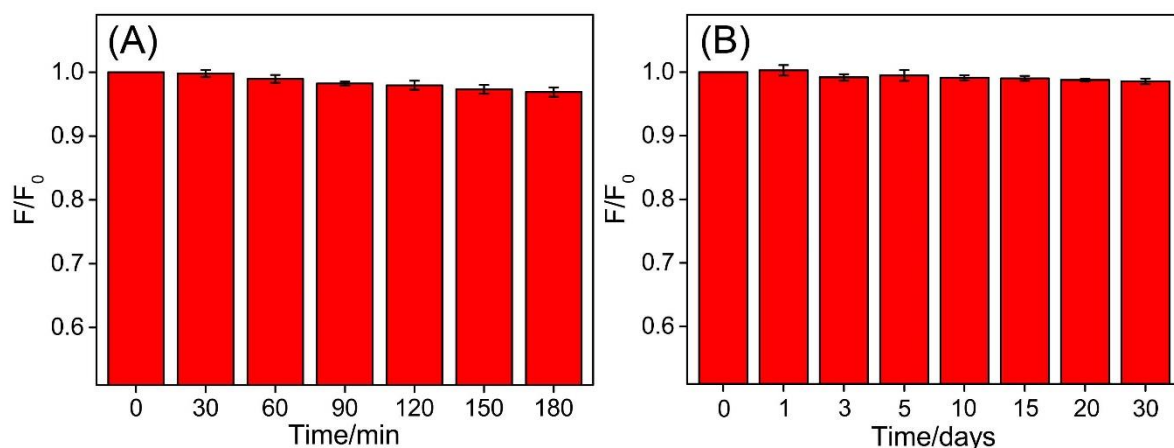

**Fig. S3.** (A) FL intensity of N-GQDs when irradiated for different time under UV light (365 nm). (B) FL intensity of N-GQDs when stored for different time without protecting from light.

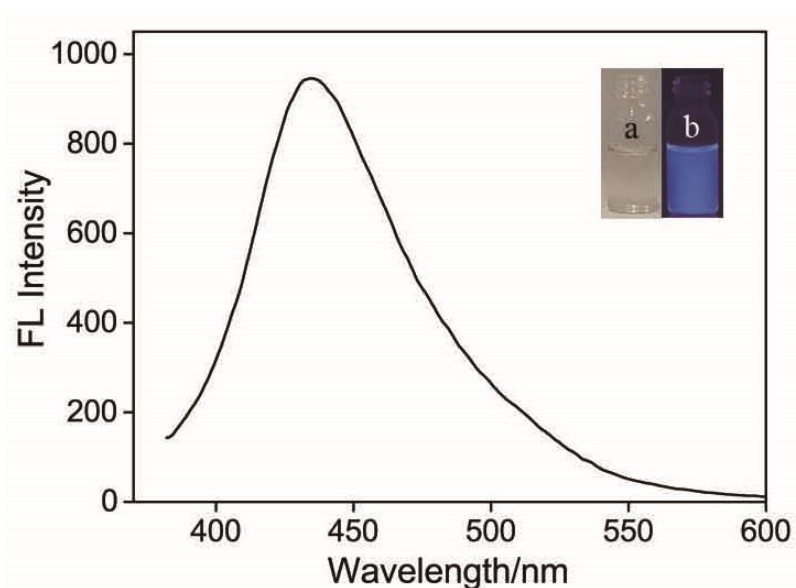

**Fig. S4.** Fluorescence spectra of the N-GQDs in ethanol solution when excited at 360 nm. Insets are photographs of N-GQDs ethanol solution under sunlight (left) and UV light (right, 365 nm).

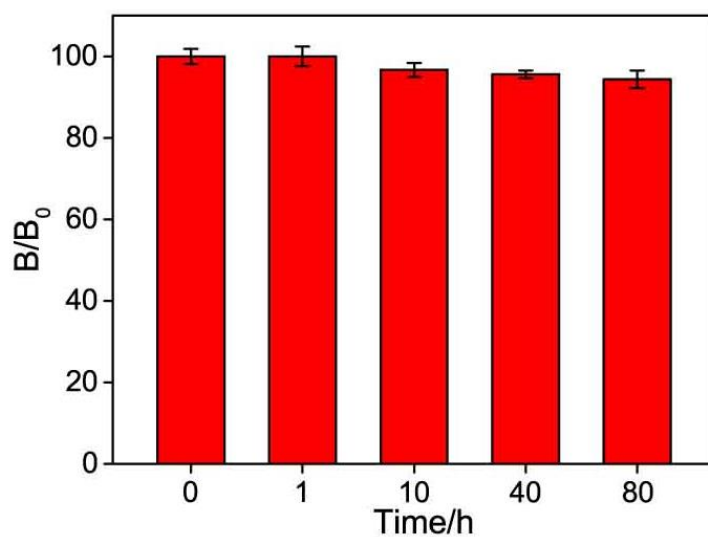

**Fig. S5.** Change of brightness of ZSTU pattern under Xenon lamp at different irradiation time.
